# Supplementary material for: A fully integrated microfluidic platform for highly sensitive analysis of immunochemical parameters
Source: Royal Society of Chemistry journal article supplement (doi:10.1039/c7an00547d), 2017-01-01

# Centrifugal microfluidic cartridge

## *Top side*

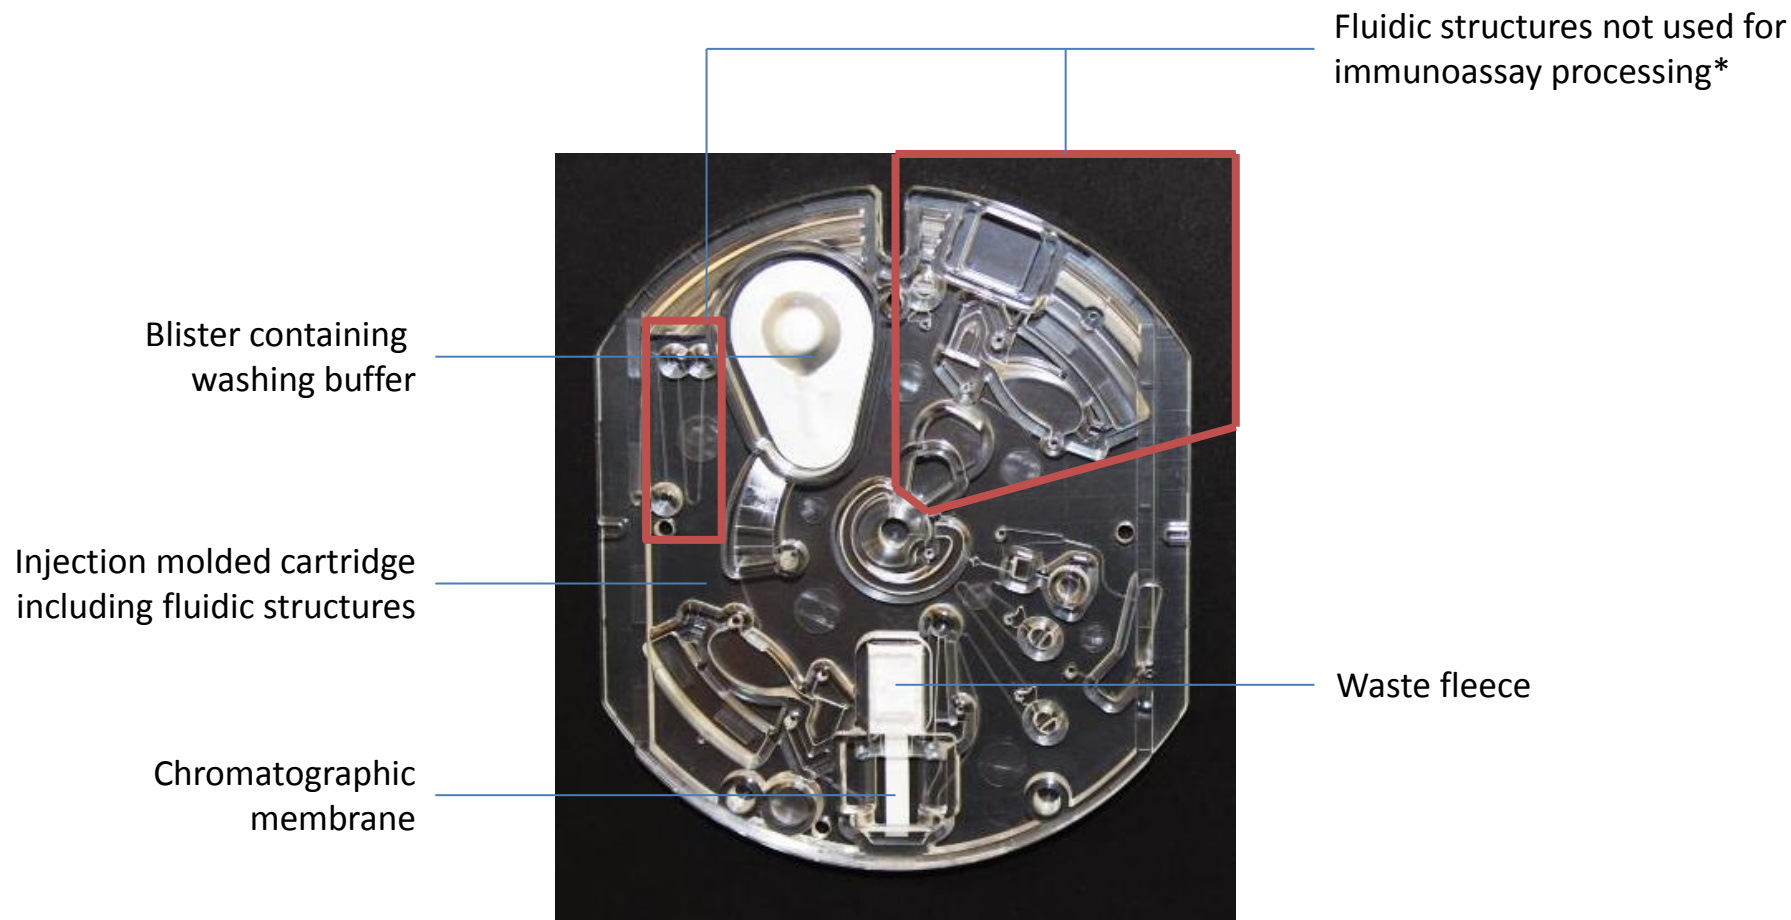

\* Additional structures integrated into the injection molded part to test an alternative aliquoting structure and priming capillary

# Breadboard for cartridge development and immunoassay processing

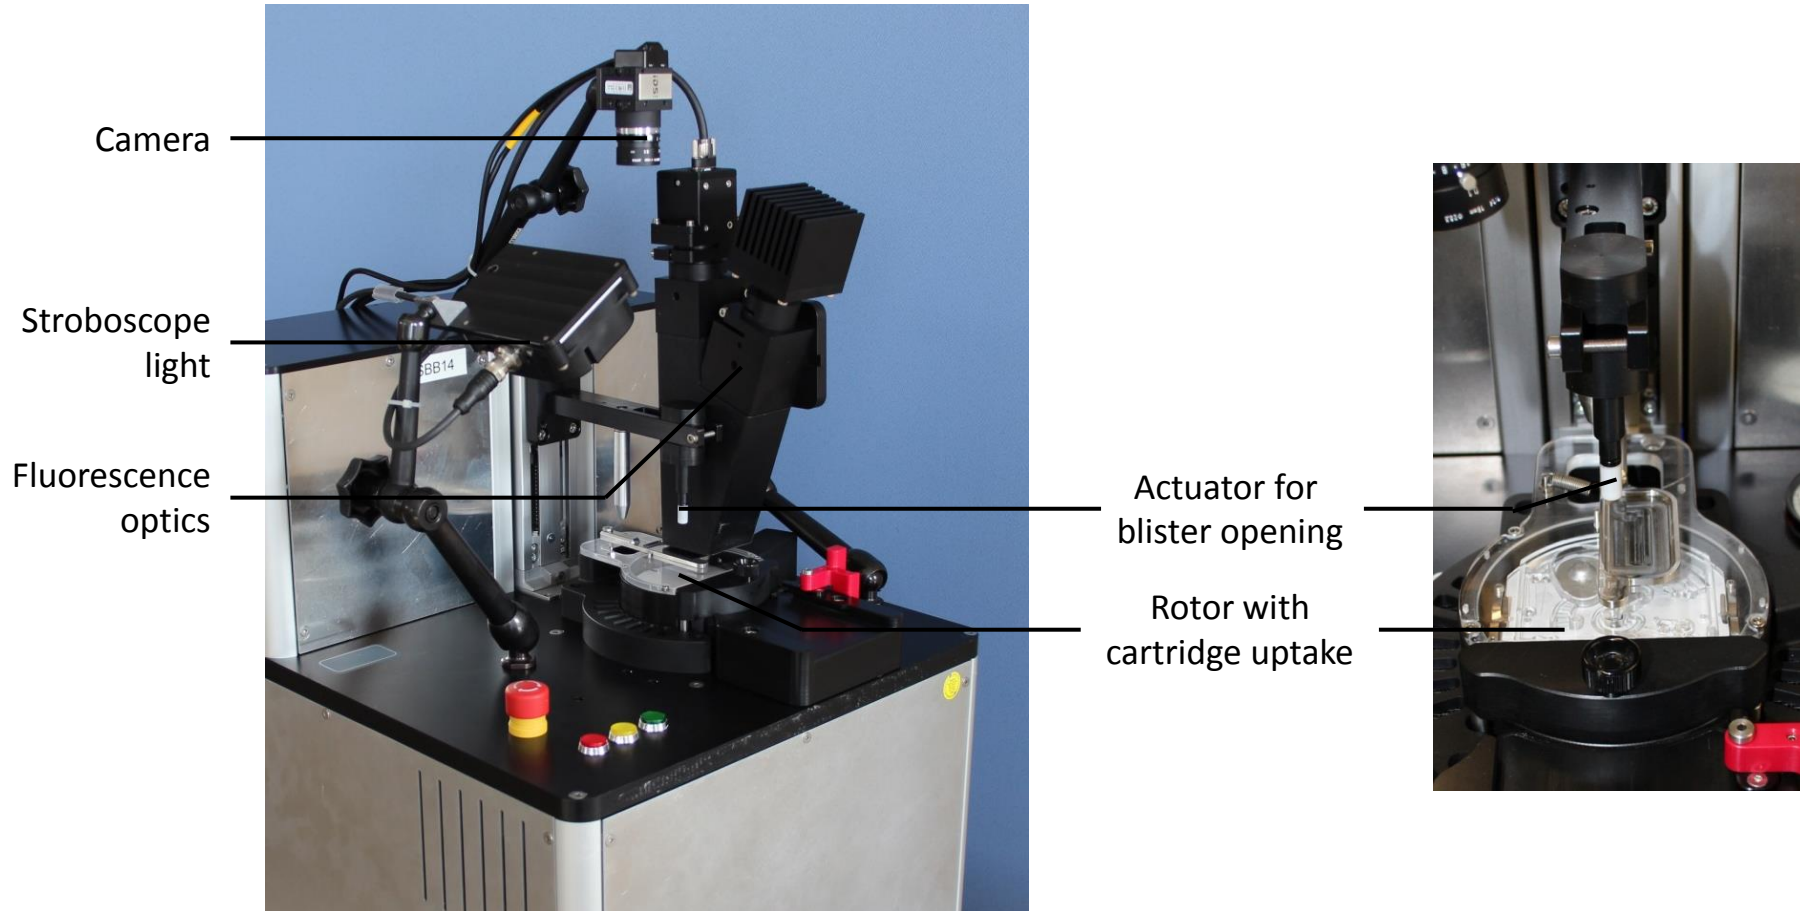

Supplement: c7an00547d1.pdf [file c7an00547d1.pdf]
